# Supplementary material
Source: MDPI journal article supplement (https://www.mdpi.com/2073-4441/10/4/519)

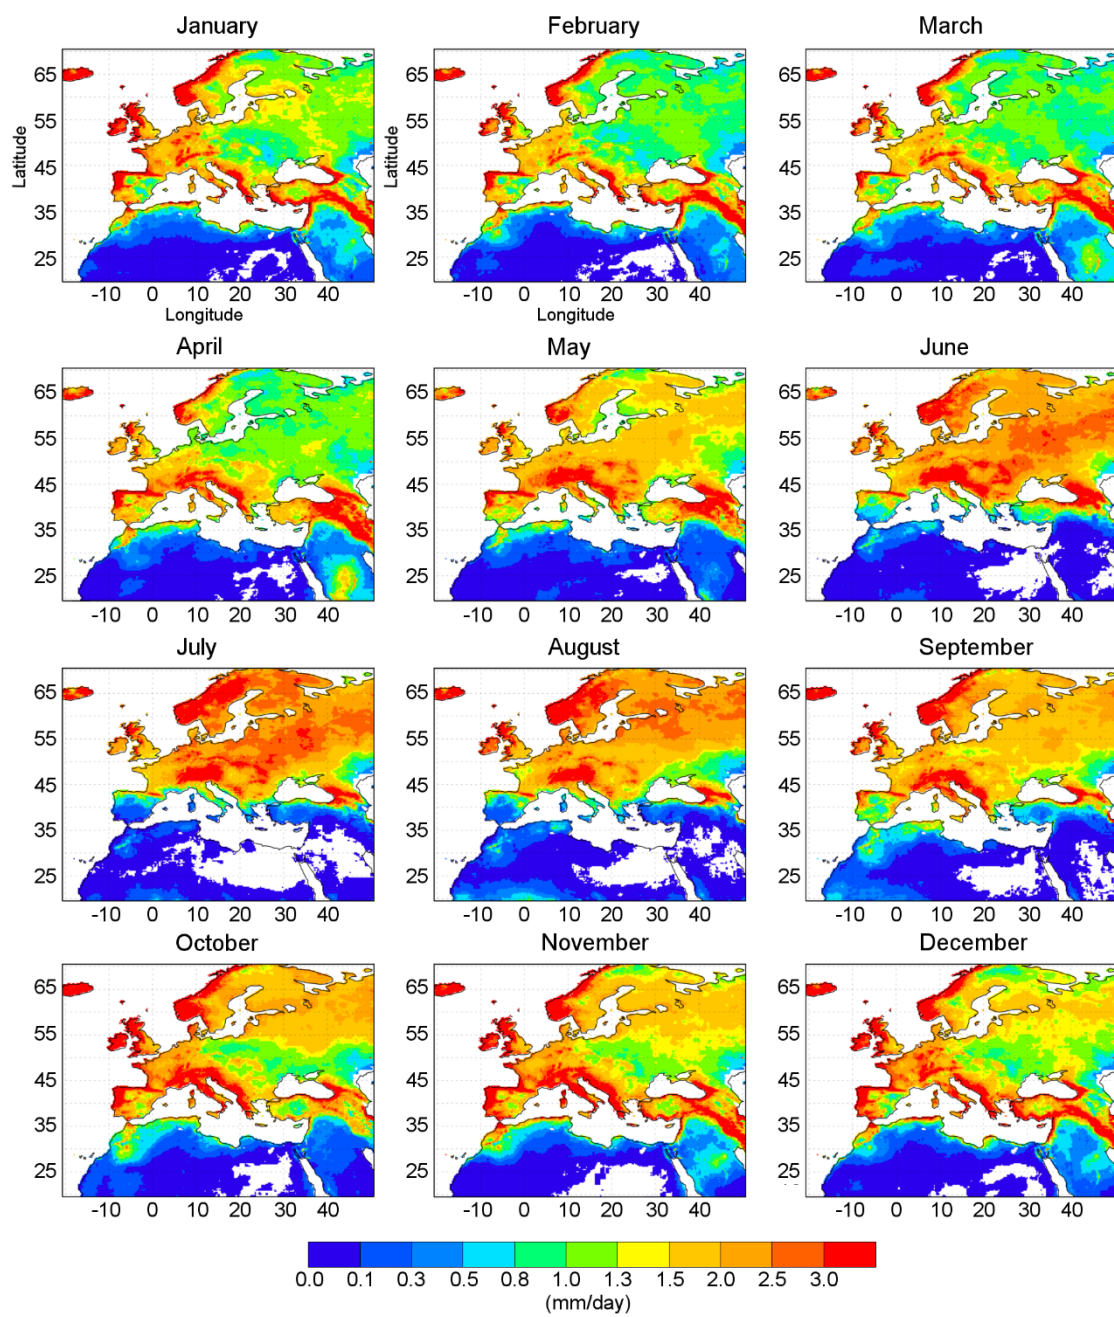

Figure S1

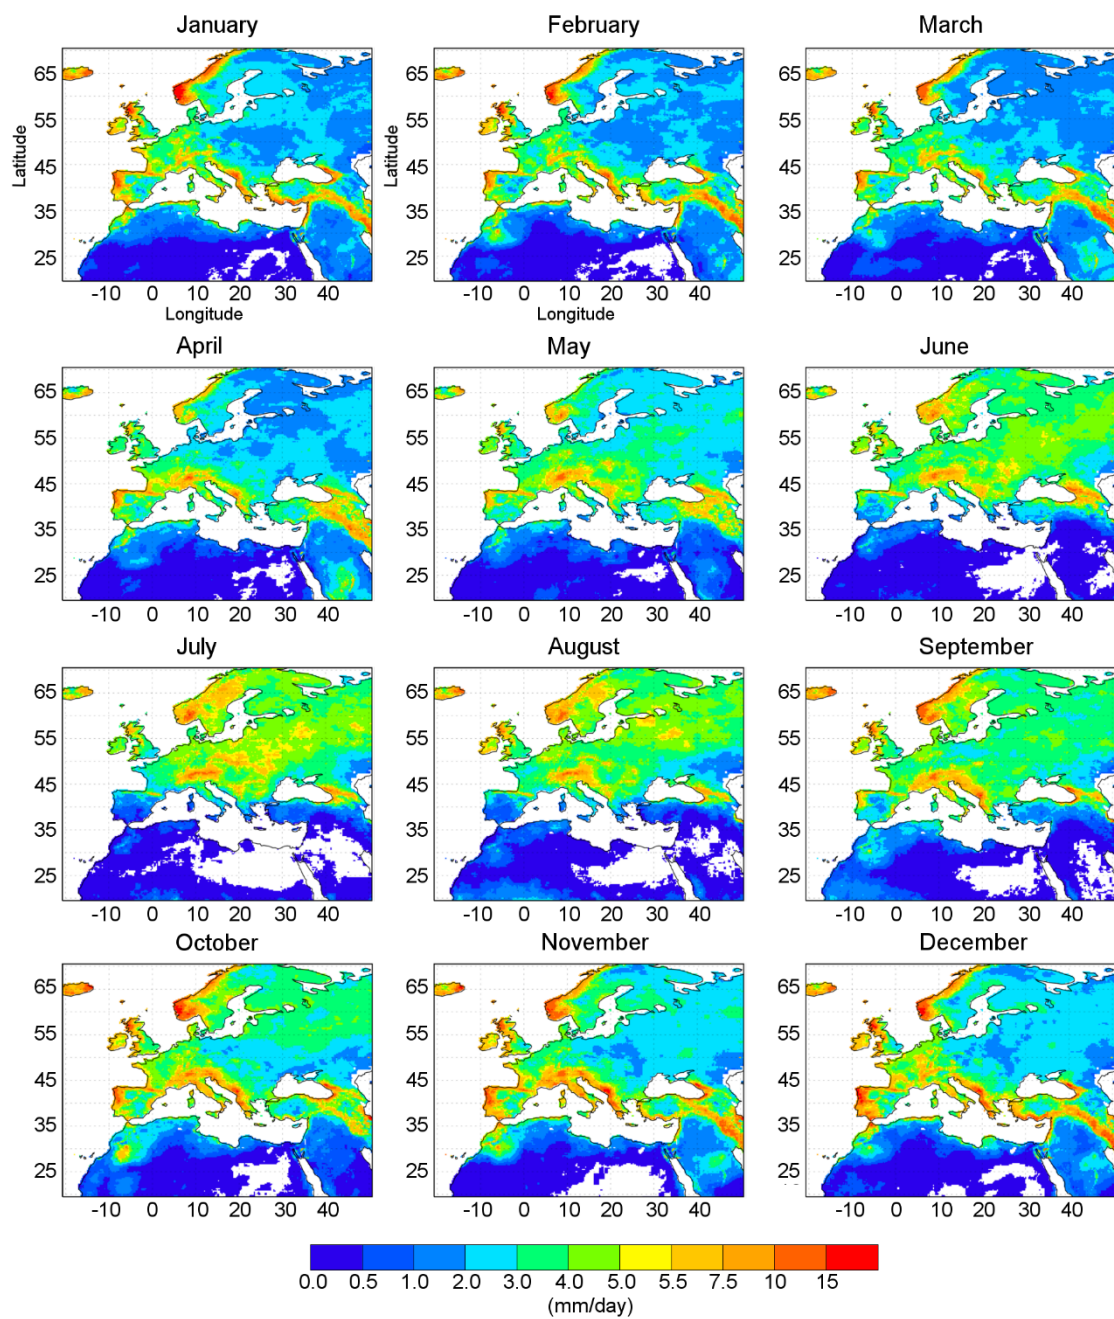

Figure S2

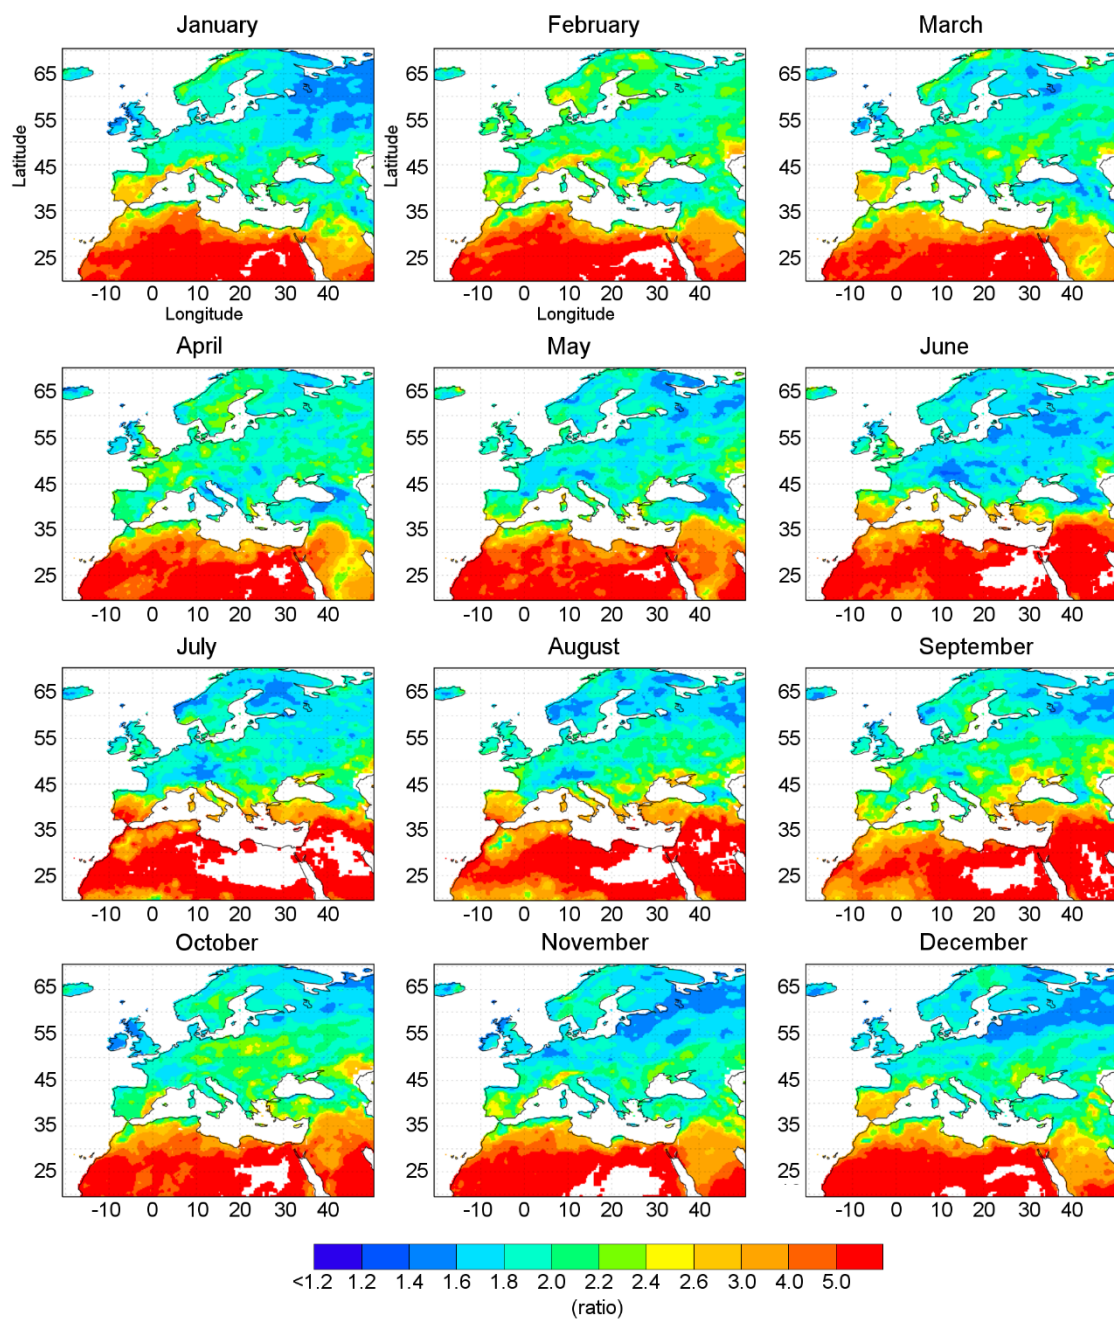

Figure S3



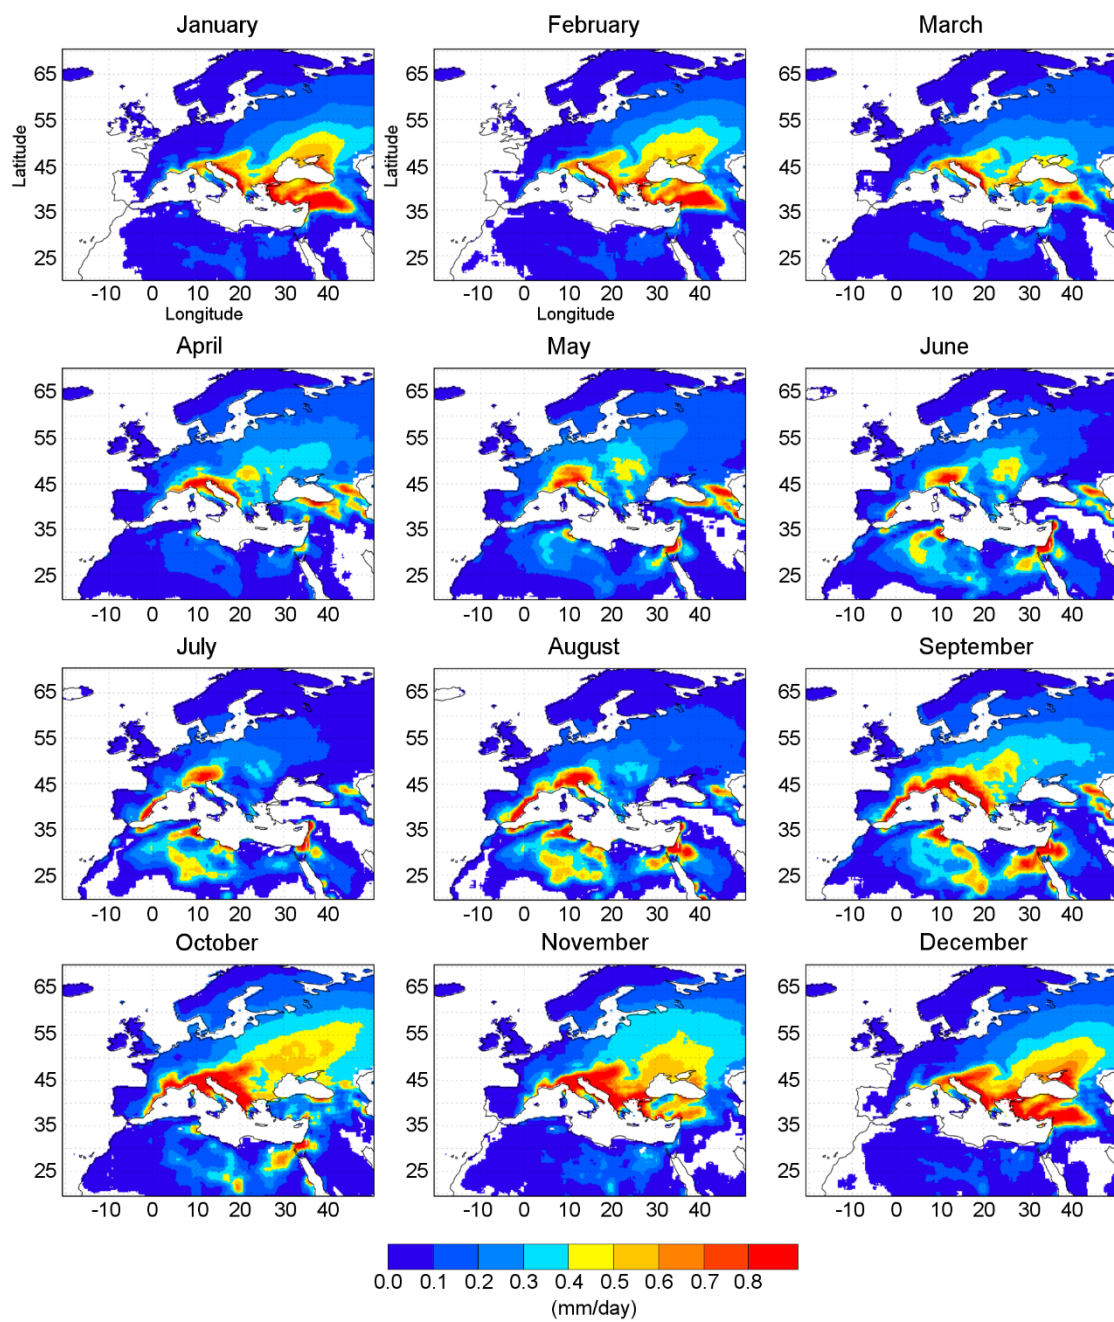

Figure S4



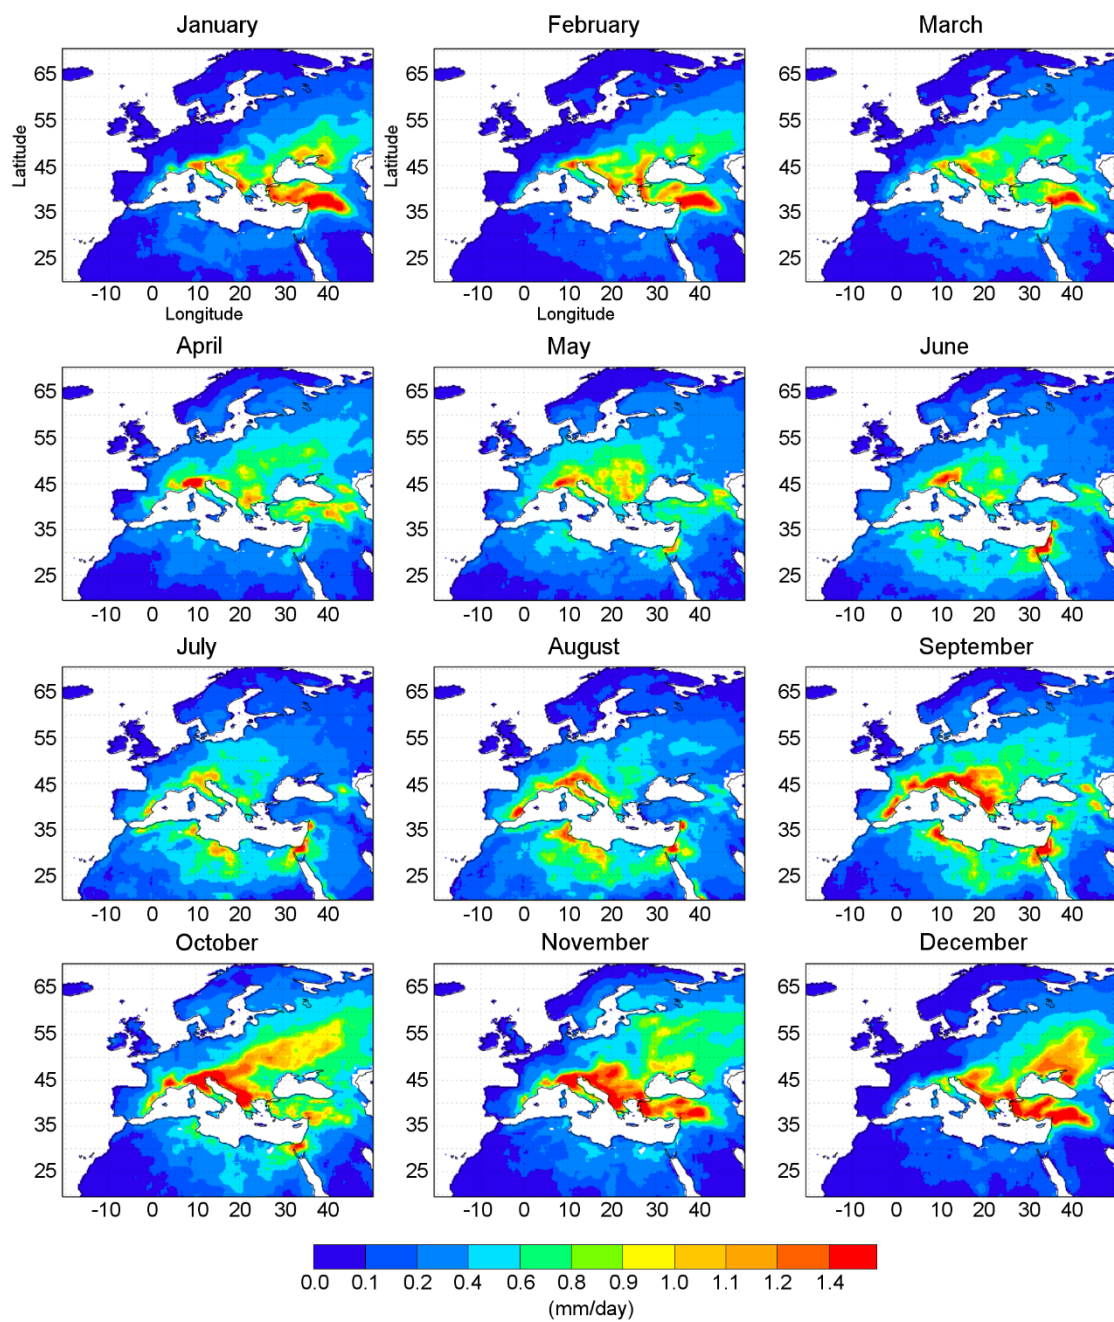

Figure S5

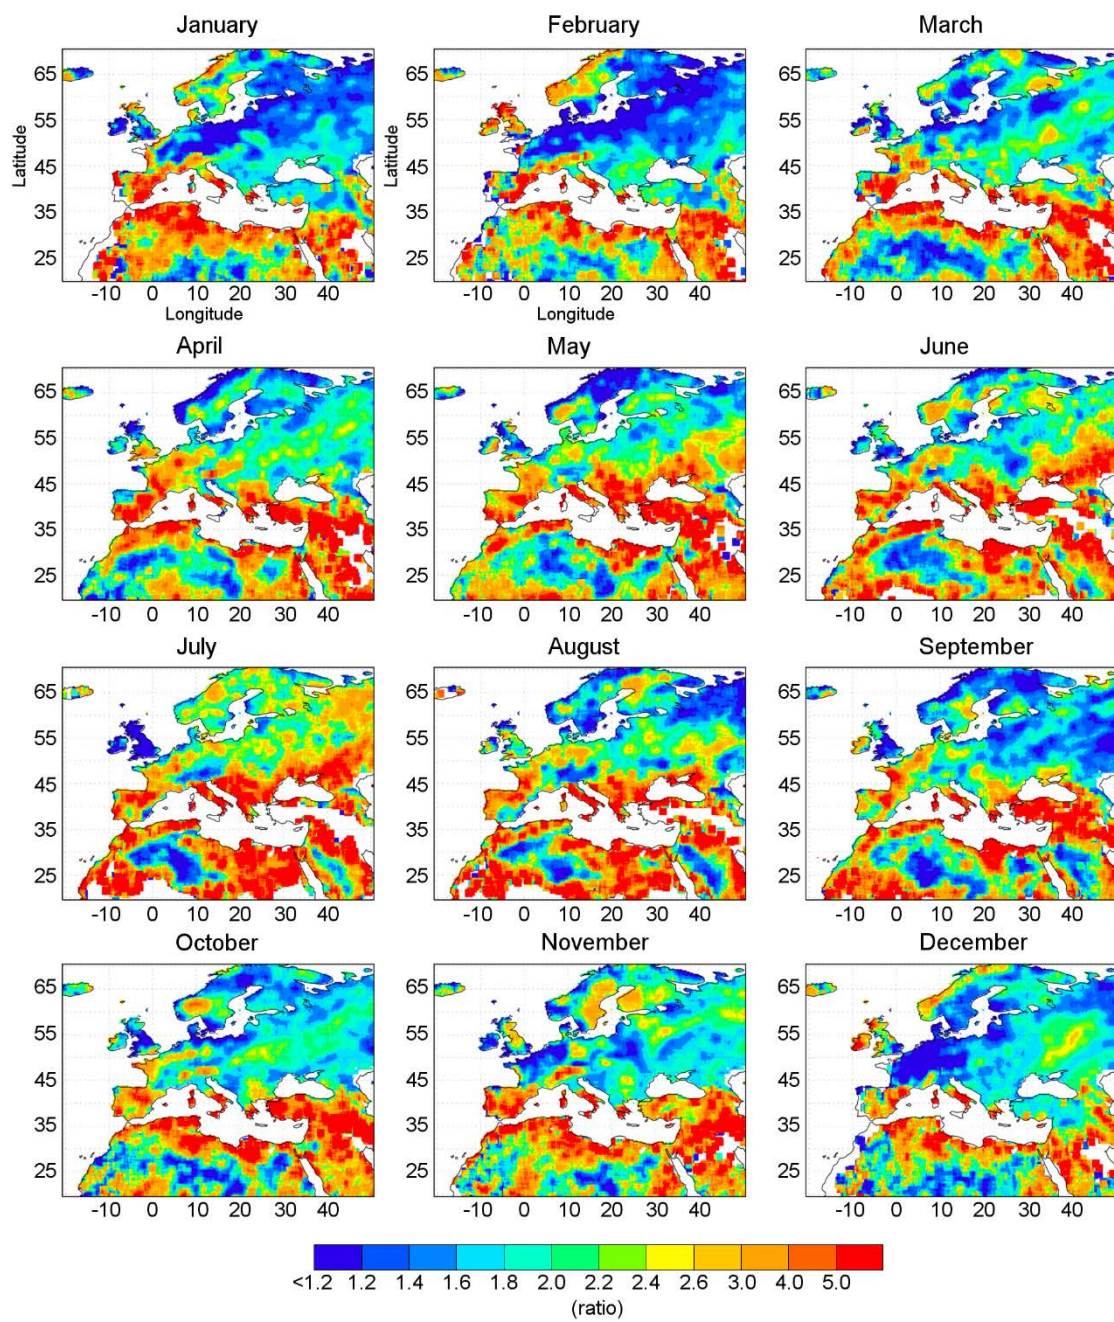

Figure S6



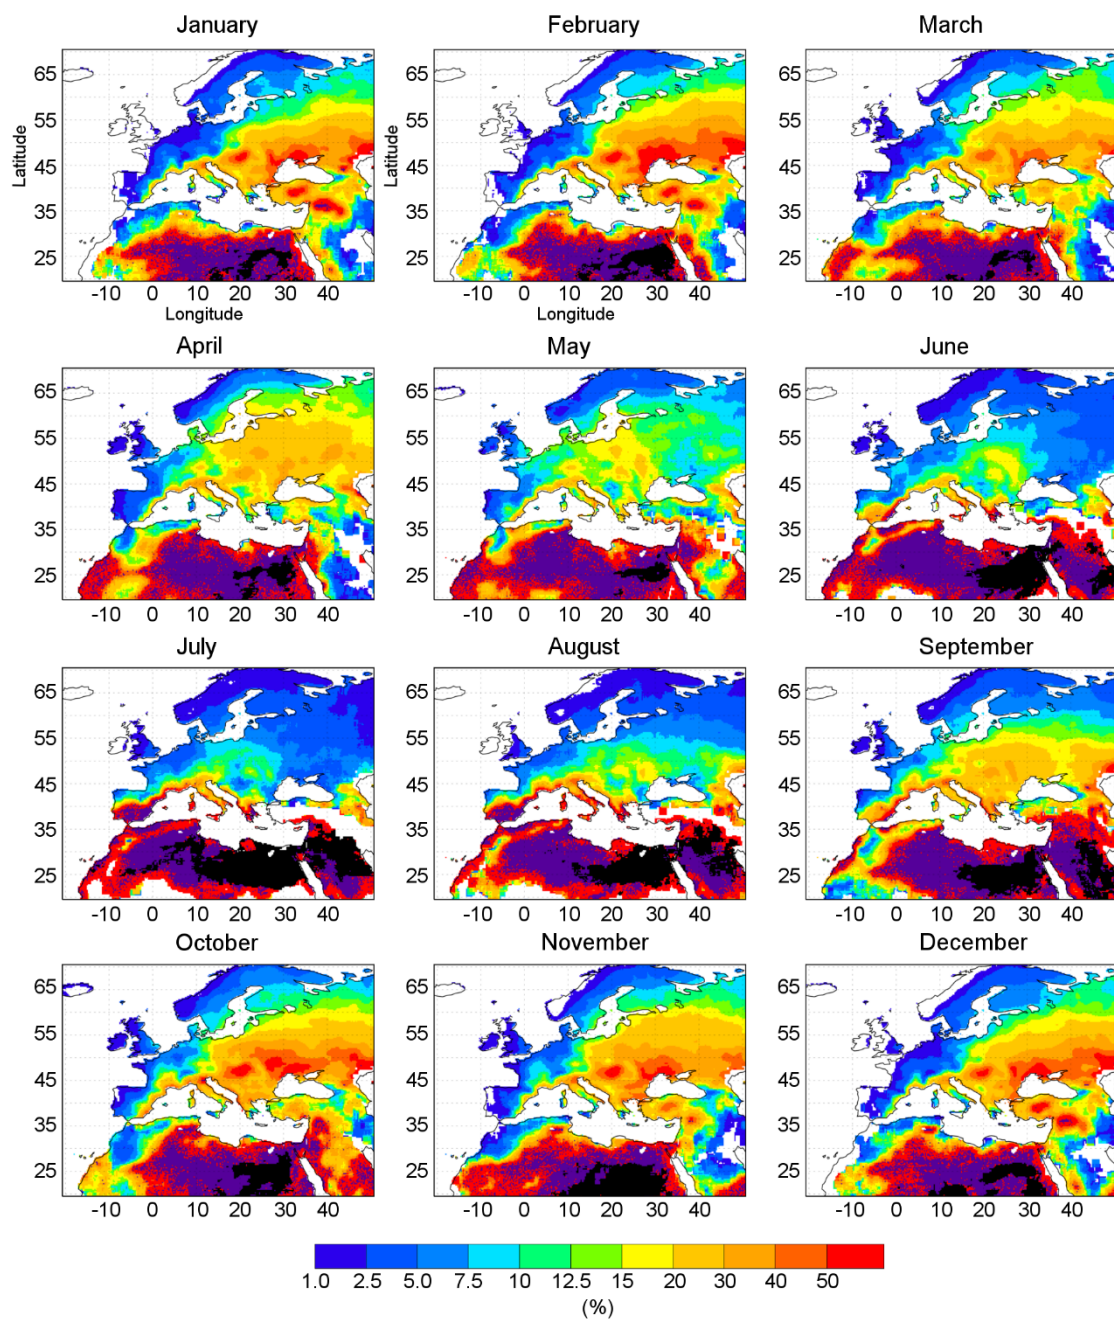

Figure S7



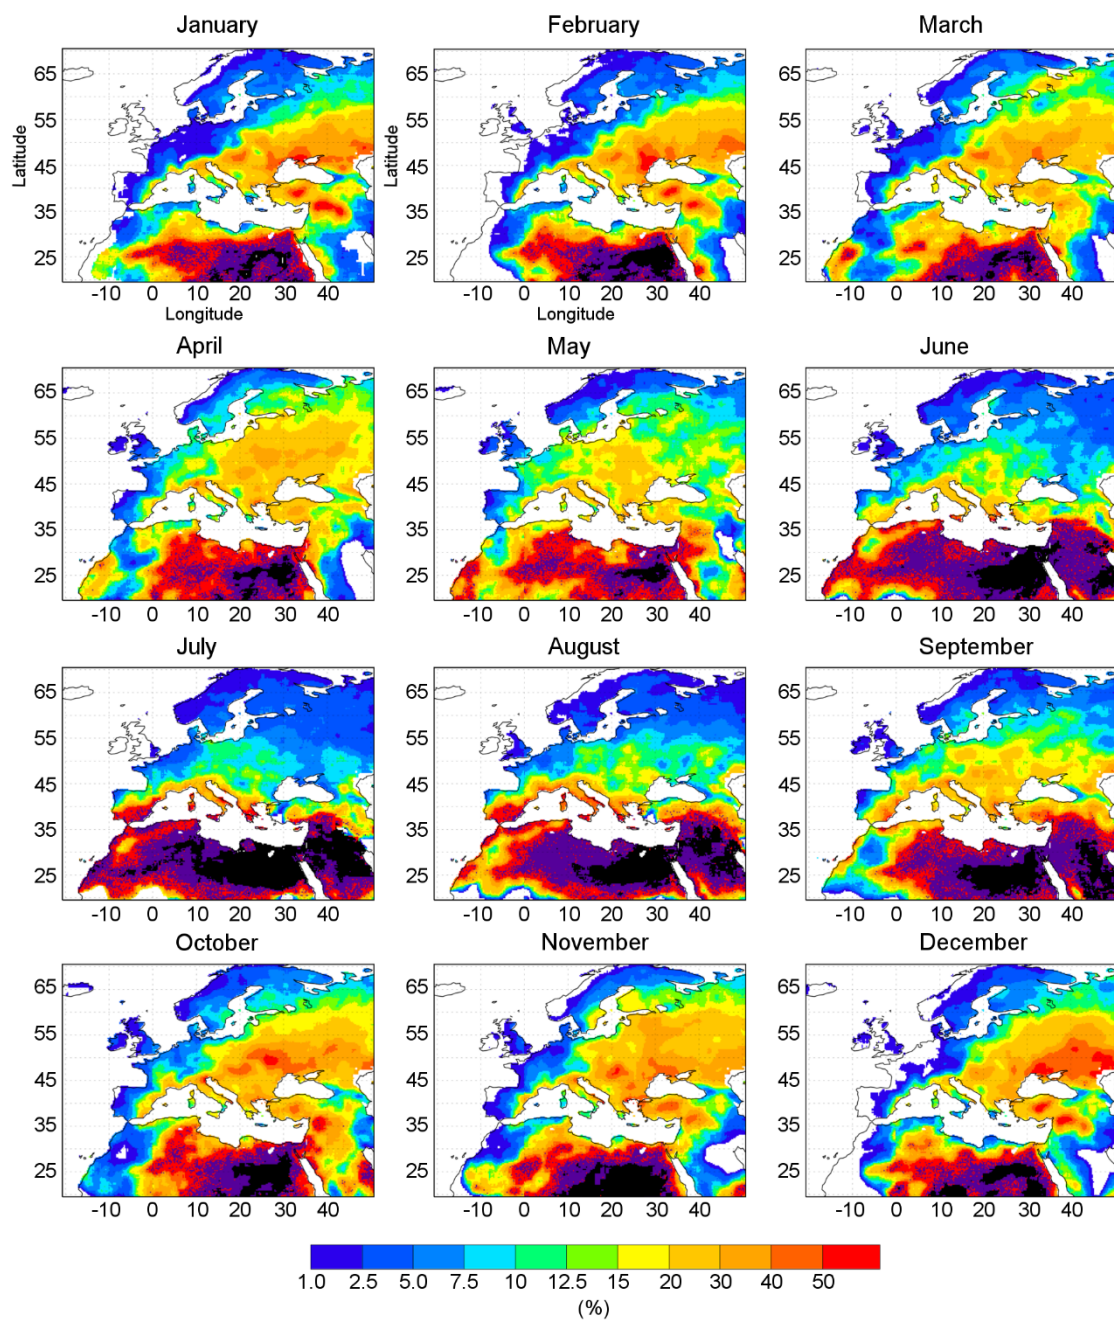

Figure S8

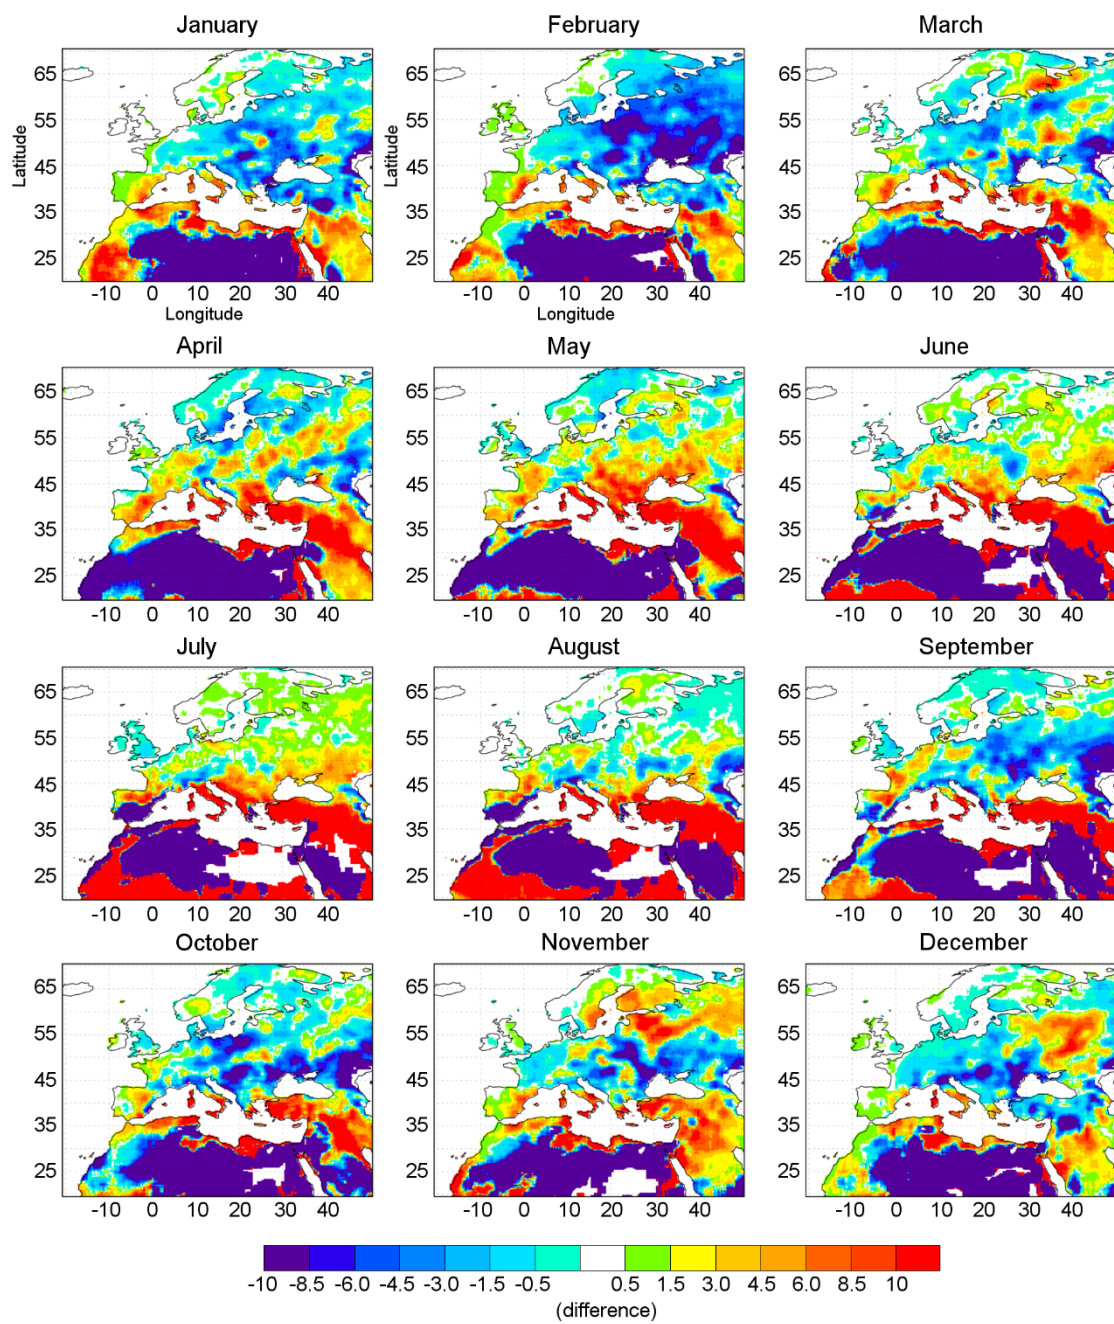

Figure S9

Supplement: s1 [file s1]
